# Supplementary material
Source: Springer Nature journal article supplement (https://www.springermedizin.de/resource/supplementary/12891_2010_1163_MOESM2_ESM.pdf/9507244)
Supplement: MOESM2 [file 9507244]

# of records identified through  
database searching = 128  
(Pubmed, EMBASE and the  
Cochrane Library)

# of records identified through  
other sources = 5  
(bibliography of shortlisted articles,  
web-search in Google)

Number of records after duplicates removed = 128

# of records screened on the  
basis of title and abstract = 128

# of records excluded = 119

# of full-text articles assessed  
for eligibility = 9

# of full-text articles excluded = 7  
Reasons:  
Study design-ineligible =1  
Intervention-ineligible =2  
Comparison-ineligible = 1  
Outcome-ineligible=3

# of studies included = 2
